# Supplementary material for: A binaphthyl derivative with a wide temperature range of a blue phase
Source: Royal Society of Chemistry journal article supplement (doi:10.1039/b902898f), 2009-01-01
Supplement: b902898f3.pdf [file b902898f3.pdf]

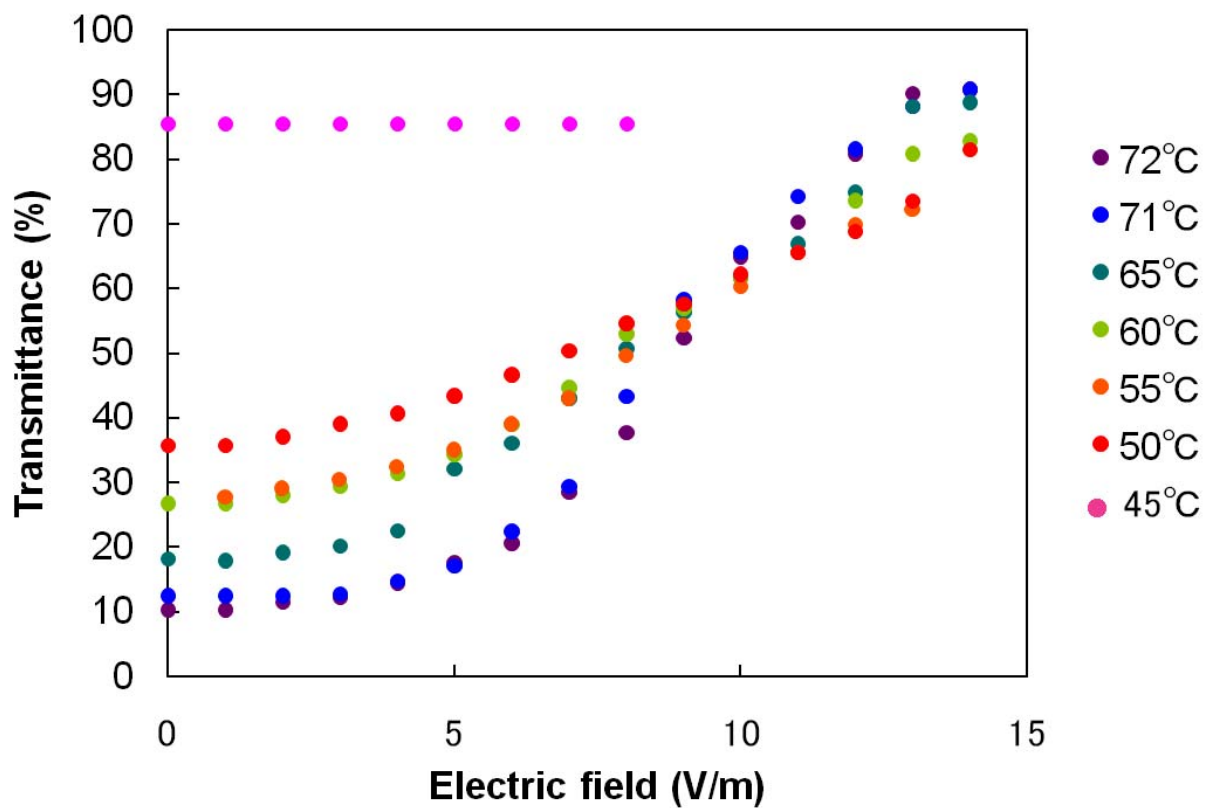

ESI Fig. S3 Temperature dependence of optical transmittance of compound **1** in the BP as a function of an AC field at a frequency of 0.1 Hz.
