# Supplementary figures and images for: A binaphthyl derivative with a wide temperature range of a blue phase
Source: Royal Society of Chemistry journal article supplement (doi:10.1039/b902898f), 2009-01-01

(a)

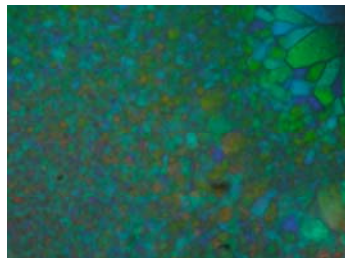

(b)

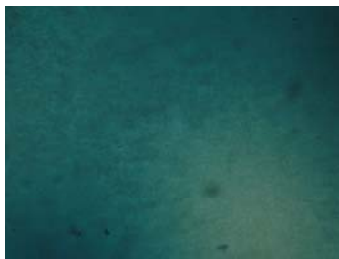

ESI Fig. S1 Photomicrographs of (a) the blue phase at 71°C of compound **1** and (b) that after being sheared.

Supplement: b902898f1.pdf [file b902898f1.pdf]
